# Supplementary material for: Cellular Localization and Regulation of Expression of the PLET1 Gene in Porcine Placenta
Source: Int J Mol Sci. 2016 Dec 7;17(12):2048. doi: 10.3390/ijms17122048 (PMC5187848; doi:10.3390/ijms17122048)
Supplement: Supplementary file 1 [file ijms-17-02048-s001.xlsx]

## Sheet: Sheet1
Supplemental Table S1. All the primers used in this study
Primer names	Primer pair	Primer sequence	application	Accession no	Efficiency
UPM	Forward	AAGCAGTGGTATCAACGCAGAGTAC	5′RACE
GSP5	Reverse	GTCCGAAGCACAGAAACAGCCTCAGA	5′RACE	NM_213744.1
GSP3	Forward	TCGCTCCTGCCTCCACTGAATCCTTCCATGCTC	3′RACE	NM_213744.1
UPM1	Reverse	CTAATACGACTCACTATAGGGCAAGCAGTGGTATCAACGCAGAGT	3′RACE
UPM2	Reverse	CTAATACGACTCACTATAGGGC	3′RACE
PLET1-L	Forward	ACAACCAACACCACAGCCAATCT	qRT-PCR	NM_213744.1	1.021
	Reverse	TTTTAATGCCCACATAAACGAATCA
PLET1-total	Forward	AAGAATCCAGGTCAACCCAAAGG	qRT-PCR	NM_213744.1	0.922
	Reverse	AGACTTGTAGCTCGACGGTGTTT
GAPDH	Forward	ATCCCGCCAACATCAAAT	qRT-PCR	NM_001206359.1	1.004
	Reverse	CACGCCCATCACAAACAT
psiCHECK2-S	Forward	AGGCGATCGCTCGAGAAGGAAGCTGGGGGAGCAA	PLET1-S 3′UTR amplification	NM_213744.1
	Reverse	GCGGCCAGCGGCCGCTCTTGTTCAAAGTGTAGTTTATT
psiCHECK2-L	Forward	AGGCGATCGCTCGAGAAGGAAGCTGGGGGAGCAA	PLET1-L 3′UTR amplification	NM_213744.1
	Reverse	GCGGCCAGCGGCCGCCCATTGATTTTTTTTTTAATGCCC
psiCHECK2-MutL	Forward1	AGGCGATCGCTCGAGAAGGAAGCTGGGGGAGCAA	Mutant of first polyadenylation signals
	Reverse1	TCTTGTTCAAAGTGTAGAAAAAATGGTATGACATAGAAA
	Forward2	TTTCTATGTCATACCATTTTTTCTACACTTTGAACAAGA
	Reverse2	GCGGCCAGCGGCCGCCCATTGATTTTTTTTTTAATGCCC
psiCHECK2-PLET1-L-mut(PLET1-L-mut)	Forward	AGGCGATCGCTCGAGAAGGAAGCTGGGGGAGCAA	Mutant of miR-365-3p binding site
	Reverse	GCGGCCAGCGGCCGCCCATTGATTTTTTTTTTAGTTCTAA
wild-26F	Forward	AGGCGATCGCTCGAGTTGATTCGTTTATGTGGGCATTAAAA	truncted 3′UTR containing miR-365-3p binding site	NM_213744.1
wild-26R	Reverse	GCGGCCAGCGGCCGCTTTTAATGCCCACATAAACGAATCAA
Mut-26F	Forward	AGGCGATCGCTCGAGTTGATTCGTTTATGTGGTCAGCAAAA	Mutate to the miR-365 -3p binding site
Mut-26R	Reverse	GCGGCCAGCGGCCGCTTTTGCTGACCACATAAACGAATCAA
ssc-miR-365-3p		UAAUGCCCCUAAAAAUCCUUAU	interaction of miR-365-3p between PLET1-S,PLET1-L,PLET1-L-mut ，and,the truncted vector	MIMAT0013904
mut-ssc-miR-365-3p		UGGUGCATCUAAAAAUCCUUAU	interaction of miR-365-3p between PLET1-S,PLET1-L, PLET1-L-mut
